# Association between patient race/ethnicity and invasive ventilation in hypoxemic respiratory failure

Fred M. Abdelmalek,

Federico Angriman ORCID 0000-0003-0971-386X,

Julie Moore,

Kuan Liu,

Lisa Burry ORCID 0000-0002-6545-3890,

Laleh Seyyed-Kalantari,

Sangeeta Mehta ORCID 0000-0002-7073-4769,

Judy Gichoya,

Leo Anthony Celi,

George Tomlinson,

Michael Fralick,

Christopher J. Yarnell ORCID 0000-0001-5657-9398

October 31, 2022

Abstract: 348 words

Manuscript: 3,028 words

## Author details

### *Corresponding author*

Christopher Yarnell

585 University Ave, Toronto General Hospital, 10MB ICU

Toronto, ON, Canada

M5G 2N2

[christopher.yarnell@uhn.ca](mailto:christopher.yarnell@uhn.ca)

### *Affiliations*

Institute of Health Policy, Management, and Evaluation, University of Toronto, Toronto, Canada (CJY, FAngriman, KL, GT)

University Health Network / Sinai Health, Toronto, Canada (CJY, JM, LB, SM, GT, MF)

Interdepartmental Division of Critical Care Medicine, University of Toronto, Toronto, Canada (FA, LB, SM, CJY)

Leslie Dan Faculty of Pharmacy, University of Toronto, Toronto, Canada (LB)

Lawrence S. Bloomberg Faculty of Nursing, University of Toronto, Toronto, Canada (JM)

Department of Electrical Engineering and Computer Science, Lassonde School of Engineering, York University (LSK)

Sunnybrook Health Sciences Center, Toronto, Canada (FA)

University of Toronto, Faculty of Medicine, Toronto, Canada (FAbdelmalek)

Emory University, Department of Radiology and Biomedical Informatics, Atlanta, GA,  
USA (JG)

Division of Pulmonary, Critical Care and Sleep Medicine, Beth Israel Deaconess  
Medical Center, Boston, MA, USA (LC)

Department of Biostatistics, Harvard T.H. Chan School of Public Health, Boston, MA,  
USA (LC)

### *Declaration of conflicts of interest*

No conflicts to declare.

### *Funding*

Dr Yarnell was funded by the Canadian Institutes for Health Research Vanier Scholar program, the Eliot Phillipson Clinician Scientist Training Program, and the Clinician Investigator Program of the University of Toronto. Funders had no role in the design and conduct of the study; collection, management, analysis, and interpretation of the data; preparation, review, or approval of the manuscript; nor in the decision to submit the manuscript for publication. The opinions, results and conclusions reported in this paper are those of the authors and are independent from the funding sources. No endorsement by any of the funding agencies is intended or should be inferred.

### *Acknowledgements*

We thank the following for helpful comments: Martin Uerner.

## Key Points

### *Question*

What is the association between patient race/ethnicity and the use of invasive ventilation in hypoxemic respiratory failure, and what is the impact of any differences on survival?

### *Findings*

We studied 38,263 patients from two US databases, who were 2% Asian (892), 11% Black (4,289), 5% Hispanic (1,964), and 81% white (31,118). Invasive ventilation occurred in 3,511 (9.2%), and 2,869 (7.5%) died. The hazard ratio (HR) for invasive ventilation was lower in Asian (HR 0.82, CrI 0.70 to 0.95), Black (HR 0.78, CrI 0.71 to 0.86), and Hispanic (HR 0.70, CrI 0.61 to 0.79) patients as compared to white patients. For the average patient, race/ethnicity differences in invasive ventilation rates did not mediate differences in 28-day survival. For the reference patient, at inspired oxygen fractions up to 0.9, lower invasive ventilation rates mediated a modest survival benefit, whereas at inspired oxygen fraction of 1.0, the lower invasive ventilation rates mediated a modest survival decrease, although the absolute changes were all less than 1.5%.

### *Meaning*

Asian, Black, and Hispanic patients had a lower rate of invasive ventilation than white patients. Although this difference had no impact on 28-day survival for the average patient, the change in survival mediated by lower rates of invasive ventilation could range from slight benefit at lower inspired oxygen fractions to slight harm at inspired oxygen fraction of 1.0.

## Abstract

*Importance:* Differential use of therapies for respiratory failure according to patient race/ethnicity may represent health inequity and could impact patient survival.

*Objective:* Measure the association between patient race/ethnicity and the use of invasive ventilation, and the impact of any association on survival.

*Design:* Retrospective cohort analysis using a Bayesian multistate model that adjusted for baseline covariates and time-varying severity.

*Setting:* Multicenter study using the Medical Information Mart for Intensive Care IV (MIMIC-IV) and Phillips eICU (eICU) databases from the USA.

*Participants:* Non-intubated adults receiving oxygen within the first 24 hours of ICU admission.

*Exposure:* Patient race/ethnicity (Asian, Black, Hispanic, white).

*Main outcomes and measures:* Primary output was the cause-specific hazard ratio (HR) of invasive ventilation for patient race/ethnicity. Secondary output was change in 28-day survival mediated by differences in invasive ventilation rate. We reported posterior means and 95% credible intervals (CrI).

*Results:* We studied 38,263 patients, 52% (20,033) from MIMIC-IV and 48% (18,230) from eICU, 2% Asian (892), 11% Black (4,289), 5% Hispanic (1,964), and 81% white (31,923). Invasive ventilation occurred in 3,511 (9.2%), and 2,869 (7.5%) died. The rate of invasive ventilation was lower in Asian (HR 0.82, CrI 0.70 to 0.95), Black (HR 0.78, CrI 0.71 to 0.86), and Hispanic (HR 0.70, CrI 0.61 to 0.79) patients as compared to white patients. For the average patient, lower rates of invasive ventilation did not mediate differences in survival. For a reference patient with inspired oxygen (FiO<sub>2</sub>) varied from 0.5 to 1.0, the change in survival mediated by lower rates of invasive ventilation ranged from probable benefit (probability 0.82 for Asian patients, 0.91 for Black patients, and 0.93 for Hispanic patients) at FiO<sub>2</sub> 0.5 to probable harm (probability 0.87 for Asian patients, 0.92 for Black patients, and 0.97 for Hispanic patients) at FiO<sub>2</sub> 1.0, although the mean absolute changes in mortality were all less than 1.5%.

*Conclusions:* Asian, Black, and Hispanic patients had a lower rate of invasive ventilation than white patients. The changes in 28-day survival mediated by this difference ranged from slight benefit at lower inspired oxygen fractions to slight harm at inspired oxygen fraction of 1.0, and there was no difference in survival for the average patient.

## 1 Introduction

2 Outcomes for patients with acute respiratory failure vary according to patient  
3 race/ethnicity. Across racial/ethnic categories, age-adjusted respiratory failure-related  
4 mortality in the United States is highest among non-Hispanic Black patients.<sup>1</sup> Black and  
5 Hispanic patients hospitalized with respiratory failure face a higher odds of in-hospital  
6 death than White patients.<sup>2</sup> Among patients enrolled in clinical trials, Black or Hispanic  
7 race/ethnicity as opposed to White race/ethnicity is associated with higher mortality.<sup>3</sup>  
8 Asian patients admitted to intensive care units (ICUs) also have higher age- and sex-  
9 adjusted mortality rates.<sup>4</sup>

10 Mechanisms for these disparities are not fully known.<sup>5</sup> Peripheral oximeters can  
11 overestimate arterial oxygen saturation in patients with darker skin pigment, leading to  
12 delayed initiation of supplemental oxygen.<sup>6–9</sup> Beginning in childhood, Black and  
13 Hispanic children have disproportionate exposure to air pollution.<sup>10</sup> Differences in care  
14 preferences may contribute.<sup>11</sup> Decreased access to primary and preventative care  
15 among Black patients may lead to more critical illness.<sup>12</sup> In the USA, Black and Hispanic  
16 individuals are disproportionately cared for in minority-serving hospitals, where mortality  
17 has shown less improvement over time compared to mortality in non-minority-serving  
18 hospitals.<sup>13</sup> Last, implicit bias is known to influence clinical decision-making.<sup>14</sup>

19 Differences in rates of invasive ventilation may partially explain observed disparities in  
20 mortality. Invasive ventilation is a potentially life-saving intervention for patients with  
21 severe respiratory failure, but there are no consensus criteria for its use.<sup>15–17</sup> The  
22 decision is influenced by hospital culture and vulnerable to implicit bias.<sup>14</sup> Prior studies

23 offer conflicting findings on the association between race/ethnicity and invasive  
24 ventilation. These studies are limited because none adjusted for time-varying severity,  
25 many used decedent cohorts, and none attempted to estimate the impact of differences  
26 on outcomes.<sup>18–27</sup> We performed a retrospective cohort study with adjustment for  
27 baseline confounding and time-varying severity to investigate (1) the association  
28 between patient race/ethnicity and use of invasive ventilation and (2) the survival effect  
29 mediated by differential use of invasive ventilation.

## 30 Methods

### 31 *Study setting and patients*

32 We performed a retrospective cohort study of adult patients requiring supplemental  
33 oxygen within their first 24 hours of ICU admission. Patients were excluded if they had  
34 race/ethnicity classified as “Other” or “unknown”, had received invasive ventilation  
35 previously during the same ICU admission, or if they were admitted to ICU from the  
36 operating room. We combined data from two deidentified databases of patient-level  
37 clinical data: Medical Information Mart for Intensive Care version IV (MIMIC-IV) and  
38 Phillips eICU database (eICU).<sup>28–32</sup> MIMIC-IV includes 76,540 ICU admissions (2008-  
39 2019) from a single academic quaternary center in Boston, USA, while eICU includes  
40 200,859 admissions (2014-2015) from 208 hospitals across the USA participating in  
41 Phillips telemonitoring service for intensive care.

42 This study followed guidelines for reporting of race/ethnicity and observational study  
43 conduct.<sup>33,34</sup> Use of the MIMIC-IV database for research has been approved by  
44 institutional review board of Massachusetts Institute of Technology (number

45 0403000206). The eICU database has been deemed to meet safe harbour standards by  
46 an independent privacy expert (Privacert, Cambridge, MA, USA; Health Insurance  
47 Portability and Accountability Act Certification number 1031219–2).<sup>28,31</sup>

#### 48 *Variables*

49 The exposure was patient race/ethnicity, coded as Asian, Black, Hispanic, or white.  
50 This information was entered by an administrator who asked patients or their family for  
51 their race/ethnicity.<sup>35</sup> Baseline covariates were chosen to include confounders of the  
52 relationship between race/ethnicity and invasive ventilation, race/ethnicity and survival,  
53 and invasive ventilation and survival: age, sex, congestive heart failure (CHF), chronic  
54 obstructive pulmonary disease (COPD), cancer, dementia, year of ICU admission,  
55 database (MIMIC-IV or eICU), hospital region, teaching hospital status, and ICU type  
56 (cardiac, medical-surgical, or neuro-trauma).

57 To account for possible differences in time-varying severity by patient race/ethnicity, we  
58 included time-varying covariates: oxygen device [none, nasal prongs, facemask, non-  
59 rebreather mask, high-flow nasal cannula (HFNC), non-invasive positive pressure  
60 ventilation (NIV)], heart rate, respiratory rate, peripheral oxygen saturation, inspired  
61 oxygen fraction (FiO<sub>2</sub>), Glasgow Coma Scale (GCS), and vasopressor use. Work of  
62 breathing (normal or abnormal) and insurance information (Other, Medicaid, Medicare)  
63 were only available in MIMIC-IV data and included in a sensitivity analysis. All  
64 numerical variables were transformed, centered, and scaled (Supplement).



## 65 *Outcomes and follow-up*

66 Invasive ventilation was the primary outcome. Hospital survival at 28 days was the  
67 secondary outcome. Patients were followed from moment of first recorded oxygen use  
68 in ICU until the earliest of death or 28 days. Patients discharged alive from hospital  
69 were assumed to have survived to 28 days.

## 70 *Analysis*

71 The analysis was a continuous-time Bayesian multistate survival model with parametric  
72 baseline hazards. Patient states included oxygen therapy, invasive ventilation, ICU  
73 discharge, and death (Figure S1). Transitions originating from oxygen therapy used an  
74 exponential hazard function and adjustment for time-varying severity. Transitions  
75 originating from invasive ventilation or ICU discharge used a Weibull hazard function  
76 and adjustment for time of state entry. All transitions incorporated baseline covariates.  
77 We used skeptical prior distributions (normal with mean 0 and standard deviation 0.3)  
78 on a log-hazard scale for intercept and all coefficients.<sup>36</sup> This expressed prior belief that  
79 a large association between any single coefficient and outcome was unlikely, and  
80 biased results away from spurious extreme associations.<sup>36</sup>

81 The primary output was the cause-specific hazard ratio for invasive ventilation  
82 according to patient race/ethnicity.<sup>37</sup> The secondary output was the absolute change in  
83 survival mediated by differences in invasive ventilation rates, also known as the indirect  
84 effect. These were generated by Monte Carlo integration using Bayesian multistate  
85 modeling.<sup>38</sup> The indirect effect quantifies predicted change in patient survival if non-

86 white patients had similar probability of invasive ventilation as white patients, after  
87 adjusting for baseline covariates and time-varying severity.<sup>38</sup>

88 We reported the mediation analysis for the average patient from each race/ethnicity  
89 subgroup. Covariates for the average patients were defined by the average values of  
90 each covariate across that subgroup. We allowed for binary covariates to take the value  
91 of their proportion (for example, if 21% of patients had COPD, the COPD covariate  
92 value was set to 0.21, not 0 or 1). We also reported mediation for the average patient by  
93 race/ethnicity within subgroups of sex (male, female) and age (< 50 years, 50-65 years,  
94 65-80 years, ≥80 years).

95 We then used a reference patient where all covariate values were prespecified and only  
96 patient race/ethnicity varied. Unlike the average patient approach above, this approach  
97 allowed for comparison of primary and secondary outputs across race/ethnicity  
98 categories, because all other covariates were held constant. The reference patient was  
99 chosen to be an unwell patient with a high likelihood of invasive ventilation: high-flow  
100 nasal cannula, heart rate 100 beats per minute, respiratory rate 25 breaths per minute,  
101 average age (66.5 years), female sex, no comorbidities, and admitted to the MIMIC-IV  
102 ICU. We varied inspired oxygen fraction from 0.50 to 1.0 to examine the influence of  
103 inspired oxygen fraction on predicted survival changes mediated by differences in  
104 invasive ventilation rates.

105 The model was implemented in R v4.0.3 and Stan and parallelized on the Niagara  
106 computing cluster.<sup>39-42</sup> We used 4 parallel chains, with 250 iterations of warm-up and  
107 250 iterations of sampling. Posterior distributions were summarized using mean and  
108 95% credible interval (CrI).(Supplement)

## 109 *Sensitivity analyses*

110 We repeated the analysis within MIMIC-IV and eICU cohorts. In the MIMIC-IV cohort  
111 analysis, we included insurance status and abnormal work-of-breathing as additional  
112 covariates. In the eICU cohort analysis, we included each hospital's proportion of  
113 patients who were of non-white race/ethnicity. This covariate was included to test if  
114 differences by patient race/ethnicity could be explained by differences between  
115 hospitals that cared for many or few patients of non-white race/ethnicity.<sup>13,43</sup>

## 116 **Results**

117 We studied 38,263 patients who met eligibility criteria, 48% (18,230) from eICU and  
118 52% (20,033) from MIMIC-IV (Table 1, Figure S0). 46% were female with median age  
119 68 years (interquartile range (IQR) 56-79). Asian patients comprised 2% (892), Black  
120 patients 11% (4,289), Hispanic patients 5% (1,964), and white patients 81% (31,118).  
121 Most patients were admitted between 2014 and 2016 (58%) to a medical-surgical ICU  
122 (66%) in a teaching hospital (63%) in the Northeast (57%). Patients were from 108  
123 hospitals, 107 of which were from the eICU cohort.

124 After incorporating time-varying covariates, there were 2,124,175 observations taken at a  
125 median interval of 60 minutes (95% interval 1 to 240). The most common oxygen device  
126 was nasal prongs (used at least once by 95% of patients) while the least common was high  
127 flow nasal cannula (used at least once by 5.2% of patients). Among clinical variables,  
128 time-weighted averages included: inspired oxygen fraction 0.29 (95% interval 0.21 to  
129 0.82), peripheral oxygen saturation 97% (95% interval 92% to 100%), respiratory rate  
130 19 breaths per minute (95% interval 13 to 30).

131 *Invasive ventilation rates*

132 A total of 3,511 (9.2%) patients received invasive ventilation, of whom 92 were Asian,  
133 333 Black, 106 Hispanic, and 2,980 white. Unadjusted 28-day invasive ventilation rate  
134 was 10.3% for Asian patients, 7.8% for Black patients, 5.4% for Hispanic patients, and  
135 9.6% for white patients.

136 The cause-specific hazard ratio for invasive ventilation was lower in Asian (HR 0.82, CrI  
137 0.70 to 0.95), Black (HR 0.78, CrI 0.71 to 0.86), and Hispanic (HR 0.70, CrI 0.61 to  
138 0.79) patients as compared to white patients (Figure 1). The probability of a lower rate  
139 of invasive ventilation than white patients was greater than 0.99 for Asian, Black, and  
140 Hispanic patients. Hazard ratios for all covariates included are in the Supplement  
141 (Figure S4).

142 *Hospital survival and impact of invasive ventilation rates*

143 Death occurred in 2,869 (7.5%) patients, of whom 101 were Asian, 304 Black, 175  
144 Hispanic, and 2,289 white. Unadjusted 28-day survival was 88.7% for Asian patients,  
145 92.9% for Black patients, 91.1% for Hispanic patients, and 90.1% for white patients.

146 For the average Asian, Black, or Hispanic patient, the decreased invasive ventilation  
147 rate relative to white patients did not mediate a change in 28-day survival (Table 2).

148 The probabilities that decreased rates of invasive ventilation mediated benefit for the  
149 average patient were 0.75 (Asian), 0.76 (Black), and 0.72 (Hispanic). Average patient  
150 covariates are available in Table S1. Findings were similar within sex and age  
151 subgroups (Tables S2, S3).

152 For a prespecified reference patient, survival changes mediated by lower rates of  
153 invasive ventilation varied from probable modest benefit to probable modest harm  
154 (Figure 2). With inspired oxygen fraction of 0.5, lower rates of invasive ventilation  
155 mediated an increase in 28-day survival with probability 0.82 for Asian patients, 0.91 for  
156 Black patients, and 0.93 for Hispanic patients. However, the mean increase in survival  
157 was modest: 0.6% for Asian patients, 0.8% for Black patients, and 1.0% for Hispanic  
158 patients (Table 2). By contrast, with inspired oxygen fraction of 1.0, lower rates of  
159 invasive ventilation mediated a *decrease* in 28-day survival with probability 0.87 for  
160 Asian patients, 0.92 for Black patients, and 0.97 for Hispanic patients. The  
161 corresponding mean survival decrease was again modest: 0.9% for Asian patients,  
162 1.0% for Black patients, and 1.4% for Hispanic patients (Table 2).

### 163 *Sensitivity analyses and model diagnostics*

164 Results were consistent in a sensitivity analysis restricted to the MIMIC-IV cohort that  
165 included additional covariates of insurance status and time-varying work of breathing. In  
166 a sensitivity analysis restricted to the eICU cohort, Asian, Black, and Hispanic  
167 race/ethnicity remained associated with a lower rate of invasive ventilation (Figure S11).  
168 After adding a hospital-level covariate corresponding to the proportion of non-white  
169 patients being cared for in that hospital's ICU, the hazard ratio of invasive ventilation  
170 associated with Asian and Black race/ethnicity was slightly increased, and the hazard  
171 ratio associated with Hispanic race/ethnicity was markedly increased: Asian 0.92 (CrI  
172 0.76 to 1.00), Black 0.82 (CrI 0.76 to 1.0), and Hispanic 1.00 (CrI 0.82 to 1.20) (Figure  
173 S12). The hazard ratio for invasive ventilation associated with being cared for in a

174 hospital that had a 10% higher (absolute percent change) proportion of non-white ICU  
175 patients was 0.75 (CrI 0.71 to 0.79).

176 The Bayesian multistate model used to calculate cause-specific hazard ratios and  
177 perform mediation analysis showed good convergence and model diagnostics. Model  
178 diagnostics and hazard ratios for all transitions are in the supplement.

## 179 Discussion

180 This cohort study of 38,263 patients receiving supplemental oxygen in ICU found lower  
181 rates of invasive ventilation in Asian, Black, or Hispanic patients as compared to white  
182 patients, despite adjustment for baseline covariates and time-varying severity. For the  
183 average patient, lower rates were not associated with harm. For a prespecified  
184 reference patient receiving oxygen via high-flow nasal cannula, the change in 28-day  
185 survival mediated by lower rates of invasive ventilation ranged from probable modest  
186 benefit at inspired oxygen fractions of 0.9 or less to probable modest harm at an  
187 inspired oxygen fraction of 1.0.

188 These findings differ from prior research that shows increased rates of invasive  
189 ventilation in non-white patients compared with white patients. Studies of Medicare  
190 beneficiaries with advanced dementia and COPD patients in the Veteran's Affairs health  
191 system found an increased invasive ventilation rate in Black as opposed to white  
192 patients.<sup>18,19</sup> Research in Canada and the USA showed an increased rate of invasive  
193 ventilation at end-of-life for Asian, Black, and Hispanic decedents as compared to white  
194 decedents.<sup>20–23</sup> Results are conflicting in patients with COVID-19 pneumonia.<sup>24–27</sup> No  
195 studies incorporated adjustment for time-varying severity, meaning that prior observed

196 differences in rates of invasive ventilation by race/ethnicity could be explained by  
197 greater time-varying clinical severity.

198 Pulse oximeters are known to overestimate arterial saturation in patients with darker  
199 skin pigment, but this is unlikely to explain our results.<sup>7,9,44,45</sup> In our analysis we  
200 incorporated peripheral but not arterial oxygen saturation, but hidden hypoxemia has  
201 been associated with greater severity of illness and hospital mortality.<sup>46</sup> This suggests  
202 that adjustment for peripheral but not arterial saturation would bias results towards a  
203 higher rate of invasive ventilation, the opposite direction from our findings.

204 Lack of information on socioeconomic position could explain our results. Lower  
205 socioeconomic status is associated with Black or Hispanic race/ethnicity in the USA.<sup>47</sup>  
206 Lower invasive ventilation rates by race/ethnicity could be explained by patient, family,  
207 or clinician reluctance to use more expensive treatments in patients with lower  
208 socioeconomic position. However, our sensitivity analysis in the MIMIC-IV cohort  
209 including an insurance status covariate showed similar results, and other research has  
210 shown that residing in a lower socioeconomic neighbourhood is associated with similar  
211 or higher rates of invasive ventilation among patients with COVID-19.<sup>26,27</sup>

212 Our results suggest that invasive ventilation rate differences could be explained by  
213 variation in hospital practice associated with the proportion of patients of non-white  
214 race/ethnicity cared for in each hospital's ICUs. In the USA, patients of different  
215 race/ethnicities are clustered at hospital level, with some hospitals caring for a  
216 disproportionately high or low proportion of Black or Hispanic patients.<sup>13</sup> In one study of  
217 ICU admission rates, hospital-level variation offered a numerical explanation for  
218 differences in ICU admission rates by patient race/ethnicity at population level.<sup>43</sup>

219 Another study of end-of-life care also found that within the same hospital, Black patients  
220 received less invasive ventilation than white patients, but across all hospitals, Black  
221 patients received more invasive ventilation than white patients.<sup>48</sup> This supports our  
222 findings that differences in invasive ventilation can be explained by both within-hospital  
223 and across-hospital variability, highlighting the multilevel impact of systemic racism.

224 Bias in clinical decision-making or recognition of deterioration is a potential explanation  
225 for the findings. Such bias could result from overt racism or implicit bias.<sup>14,49</sup> Awareness  
226 of implicit bias could offer some benefit, especially if education efforts incorporate expert  
227 guidance.<sup>50,51</sup> However, bias-reduction initiatives may not generate durable  
228 improvement.<sup>52</sup> To improve equity of care for patients with respiratory failure, we will  
229 require additional strategies, such as physiologic thresholds for invasive ventilation.

230 Our results are consistent with the existence of optimal physiologic thresholds for  
231 invasive ventilation, because they imply that invasive ventilation has benefit for patients  
232 with sufficient severity of illness, and otherwise may cause harm. This interpretation is  
233 supported by prior work showing a mortality benefit with invasive ventilation for patients  
234 with acute respiratory distress syndrome and an arterial-to-inspired oxygen ratio less  
235 than 150 mmHg, or patients with COVID-19 pneumonia and higher baseline severity as  
236 measured by Sequential Organ Failure Assessment (SOFA) score.<sup>53,54</sup> The optimal  
237 physiologic thresholds for invasive ventilation are unknown<sup>55</sup>, but our analysis suggests  
238 that finding disease-specific thresholds for invasive ventilation could improve outcomes  
239 for white patients at lower severity, and for Asian, Black, and Hispanic patients at higher  
240 severity.



241 Important limitations of this study include a low proportion of patients with Asian, Black,  
242 or Hispanic race/ethnicity, a lack of international data, validity of the race/ethnicity data,  
243 parametric model specification, and unmeasured confounding. Future research should  
244 aim to replicate these findings in patient populations with a higher proportion of Asian,  
245 Black, and Hispanic patients, and in additional populations outside the USA.

246 Race/ethnicity data used in this study was gathered in the course of hospital admission,  
247 and self-identified race or ethnicity may not always match the database value. Further,  
248 the included categories of race/ethnicity encompass large, heterogeneous populations,  
249 and muddle together distinct concepts of race and ethnicity. Replication of these results  
250 using more robust data collection with nuanced self-categorization will be important.

251 Regarding model specification, the multistate model uses several parametric  
252 components, which means mediation analysis results may be biased if models were  
253 mis-specified. Last, unmeasured confounding could explain these results. Additional  
254 studies incorporating more comprehensive social determinants of health data would  
255 help clarify the association between patient race/ethnicity and invasive ventilation use.

256 The strengths of this study are its sample size, methodology, and focus on an  
257 actionable change in management. A sample size of 38,263 patients allowed for a large  
258 set of known confounding variables and adjustment for time-varying severity. The  
259 methodology was novel both because it adjusted for time-varying severity and it  
260 incorporated a mediation analysis focusing on downstream clinical impact of any  
261 observed association.<sup>38</sup> We focused on invasive ventilation rates because they present  
262 an actionable pathway to more equitable care, via use of physician self-reflection and

263 physiologic thresholds for invasive ventilation to reduce the influence of patient  
264 race/ethnicity on clinical decision-making.

## 265 Conclusions

266 Asian, Black, and Hispanic patients had lower rates of invasive ventilation than white  
267 patients, after controlling for time-varying severity and baseline confounders. Although  
268 change in survival mediated by lower rates of invasive ventilation ranged from slight  
269 benefit at lower inspired oxygen fractions to slight harm at inspired oxygen fraction of  
270 1.0, absolute change was consistently less than 1.5%. Further research on optimal  
271 thresholds for invasive ventilation, increased funding support for hospitals with  
272 minoritized patient populations, and adoption of strategies to mitigate implicit bias may  
273 help reduce differences in rates of invasive ventilation by patient race/ethnicity.

274

**Table 1: Cohort characteristics**

|                                          | Asian               | Black               | Hispanic            | White               |
|------------------------------------------|---------------------|---------------------|---------------------|---------------------|
| <b>Total (N = 38,263)</b>                | 892                 | 4,289               | 1,964               | 31,118              |
| <b>Median age (interquartile range)</b>  | 66 (55-79)          | 61 (49-73)          | 67 (52-80)          | 69 (57-80)          |
| <b>Sex (%)</b>                           |                     |                     |                     |                     |
| Female                                   | 398 (45)            | 2,193 (51)          | 906 (46)            | 14,218 (46)         |
| <b>Comorbidities (%)</b>                 |                     |                     |                     |                     |
| CHF                                      | 176 (20)            | 1,135 (26)          | 394 (20)            | 7,508 (24)          |
| COPD                                     | 59 (7)              | 559 (13)            | 229 (12)            | 5,396 (17)          |
| Cancer                                   | 223 (25)            | 726 (17)            | 287 (15)            | 6,161 (20)          |
| Dementia                                 | 65 (7)              | 440 (10)            | 221 (11)            | 3,293 (11)          |
| <b>Year of ICU admission (%)</b>         |                     |                     |                     |                     |
| 2008-2010                                | 215 (24)            | 1,127 (26)          | 343 (17)            | 6,651 (21)          |
| 2011-2013                                | 159 (18)            | 535 (12)            | 205 (10)            | 4,039 (13)          |
| 2014-2016                                | 417 (47)            | 2,375 (55)          | 1,327 (68)          | 17,913 (58)         |
| 2017-2019                                | 101 (11)            | 252 (6)             | 89 (5)              | 2510 (8)            |
| <b>Database (%)</b>                      |                     |                     |                     |                     |
| MIMIC-IV                                 | 626 (70)            | 2,887 (53)          | 771 (39)            | 16,356 (53)         |
| eICU                                     | 266 (30)            | 2,005 (47)          | 1,193 (61)          | 14,762 (47)         |
| <b>Region of hospital (%)</b>            |                     |                     |                     |                     |
| Northeast                                | 649 (73)            | 2,327 (54)          | 776 (40)            | 17,999 (58)         |
| Midwest                                  | 161 (18)            | 1,203 (28)          | 28 (1)              | 9,631 (31)          |
| West                                     | 12 (1)              | 7 (0)               | 15 (1)              | 280 (1)             |
| South                                    | 26 (3)              | 602 (14)            | 953 (49)            | 2,548 (8)           |
| Unknown                                  | 44 (5)              | 150 (3)             | 192 (10)            | 655 (2)             |
| <b>Academic teaching hospital</b>        | 669 (75)            | 2,666 (62)          | 938 (48)            | 19,937 (64)         |
| <b>Type of ICU</b>                       |                     |                     |                     |                     |
| Medical-surgical                         | 639 (72)            | 3,744 (77)          | 1,326 (68)          | 20,211 (65)         |
| Cardiac                                  | 150 (17)            | 774 (18)            | 447 (23)            | 7244 (23)           |
| Neuro/trauma                             | 103 (12)            | 374 (9)             | 191 (10)            | 3663 (12)           |
| <b>Oxygen devices used</b>               |                     |                     |                     |                     |
| Non-invasive ventilation                 | 49 (5)              | 545 (13)            | 422 (21)            | 3764 (12)           |
| High-flow nasal cannula                  | 29 (3)              | 128 (3)             | 46 (2)              | 1780 (6)            |
| Non-rebreather mask                      | 102 (11)            | 389 (9)             | 210 (11)            | 3239 (10)           |
| Face mask                                | 138 (15)            | 436 (10)            | 184 (9)             | 4354 (14)           |
| Nasal prongs                             | 835 (94)            | 4061 (95)           | 1840 (94)           | 29457 (95)          |
| <b>Time-weighted mean (95% interval)</b> |                     |                     |                     |                     |
| Heart rate (beats per minute)            | 84 (55 to 119)      | 85 (58 to 118)      | 84 (59 to 120)      | 82 (57 to 117)      |
| Respiratory rate (breaths per minute)    | 19.41 (13 to 29)    | 20 (13 to 31)       | 19 (13 to 30)       | 19 (13 to 30)       |
| Peripheral oxygen saturation             | 98 (93 to 100)      | 98 (93 to 100)      | 98 (93 to 100)      | 97 (92 to 100)      |
| Inspired oxygen fraction                 | 0.28 (0.21 to 0.83) | 0.27 (0.21 to 0.79) | 0.33 (0.21 to 0.99) | 0.29 (0.21 to 0.81) |
| Glasgow Coma Scale                       | 15 (10 to 15)       | 15 (11 to 15)       | 15 (13 to 15)       | 15 (12 to 15)       |
| Vasopressor use (% of the total time)    | 8                   | 7                   | 13                  | 9                   |

Table 2: Mediation analysis outcomes at 28 days by patient race/ethnicity

|                                                                                      | Asian               | Black               | Hispanic            | White               |
|--------------------------------------------------------------------------------------|---------------------|---------------------|---------------------|---------------------|
| <b>Average patient*</b>                                                              |                     |                     |                     |                     |
| Invasive ventilation probability                                                     | 5.3 (3.9 to 7.1)    | 3.4 (2.7 to 4.2)    | 1.9 (1.4 to 2.5)    | 5.4 (4.9 to 5.9)    |
| Change if IMV rate were equivalent to white patients                                 | 0.9 (-0.1 to 1.7)   | 0.8 (0.2 to 1.4)    | 0.9 (0.4 to 1.3)    | -                   |
| 28-day survival probability                                                          | 92.5 (90.9 to 94)   | 95.7 (94.9 to 96.4) | 93.9 (92.7 to 95)   | 92.8 (92.2 to 93.4) |
| Change if IMV rate were equivalent to white patients                                 | -0.2 (-1 to 0.5)    | -0.2 (-0.8 to 0.4)  | -0.2 (-0.8 to 0.4)  | -                   |
| Probability of <b>BENEFIT</b> mediated by lower rate of IMV                          | 0.75                | 0.76                | 0.72                | -                   |
| <b>Reference patient: FiO2 0.5, additional prespecified covariate values below**</b> |                     |                     |                     |                     |
| Invasive ventilation probability                                                     | 22.2 (18.8 to 26.2) | 21.3 (18.6 to 24.2) | 18.7 (15.8 to 21.7) | 25.3 (22.8 to 27.9) |
| Change if IMV rate were equivalent to white patients                                 | 3.1 (0.1 to 6.1)    | 4 (1.9 to 6.2)      | 6.6 (4.4 to 9.1)    | -                   |
| 28-day survival probability                                                          | 77.2 (75.2 to 79.3) | 78.6 (76.7 to 80.4) | 77.7 (75.9 to 79.7) | 76.6 (74.9 to 78.2) |
| Change if IMV rate were equivalent to white patients                                 | -0.6 (-2 to 0.7)    | -0.8 (-1.8 to 0.4)  | -1 (-2.1 to 0.2)    | -                   |
| Probability of <b>BENEFIT</b> mediated by lower rate of IMV                          | 0.82                | 0.91                | 0.93                | -                   |
| <b>Reference patient: FiO2 1.0, additional prespecified covariate values below**</b> |                     |                     |                     |                     |
| Invasive ventilation probability                                                     | 63.1 (57.7 to 68.5) | 62 (57.1 to 66.8)   | 57.9 (52.5 to 63.3) | 67.1 (62.9 to 70.8) |
| Change if IMV rate were equivalent to white patients                                 | 3.9 (0.2 to 7.7)    | 5.1 (2.4 to 8.1)    | 9.2 (5.6 to 13)     | -                   |
| 28-day survival probability                                                          | 58.5 (55.3 to 61.3) | 58.9 (55.9 to 61.7) | 57.4 (54.1 to 60.5) | 58.7 (56.2 to 61.4) |
| Change if IMV rate were equivalent to white patients                                 | 0.9 (-0.6 to 2.3)   | 1 (-0.4 to 2.3)     | 1.4 (-0.1 to 3)     | -                   |
| Probability of <b>HARM</b> mediated by lower rate of IMV                             | 0.87                | 0.92                | 0.97                | -                   |

Table caption: This table shows the outcomes at 28 days predicted by the mediation analysis using the Bayesian multistate model.

IMV = invasive mechanical ventilation, HFNC = high flow nasal cannula, FiO2 = inspired oxygen fraction.

\*The covariates for the average patient by race/ethnicity are similar to the average values in table 1 and can also be found in table S1 of the supplement.

\*\*The reference patient had covariates set as follows: age = 66.6, sex = female, no comorbidities, year of ICU admission = 2017-2019, ICU type = medical-surgical, academic teaching hospital = yes, region = Northeast, database = MIMIC-IV, heart rate = 100 beats per minute, respiratory rate = 25 breaths per minute, peripheral oxygen saturation = 94%, GCS = 15, vasopressors = none, oxygen device = high-flow nasal cannula. IMV = invasive mechanical ventilation, HFNC = high-flow nasal cannula.

## Figure 1: Cause-specific hazard ratios for invasive ventilation

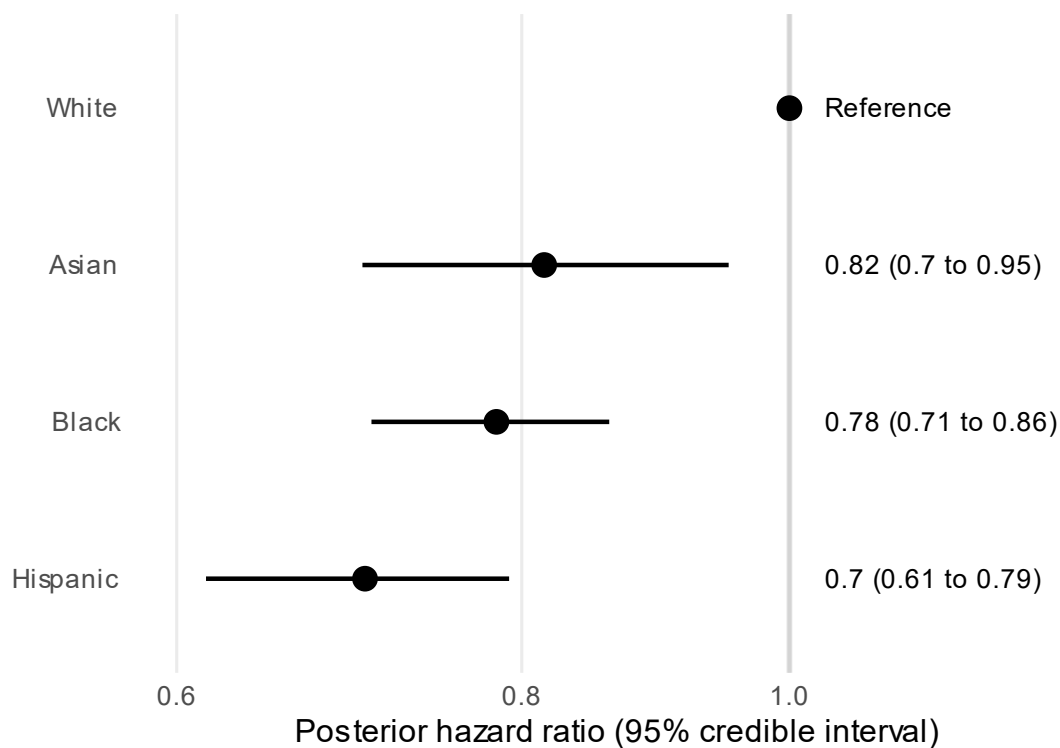

Figure 1 caption: This figure shows the posterior hazard ratios for the transition from oxygen therapy to invasive ventilation (x-axis) by patient race/ethnicity (y-axis). White race/ethnicity is the reference category. The x-axis scale is logarithmic. The posterior mean hazard ratios (with 95% credible intervals) are in the righthand column. The figure shows that Asian, Black, and Hispanic patients had a lower hazard of invasive ventilation than white patients, with the largest discrepancy seen in Hispanic patients.

## Figure 2: Predicted outcomes for a patient on high-flow nasal cannula

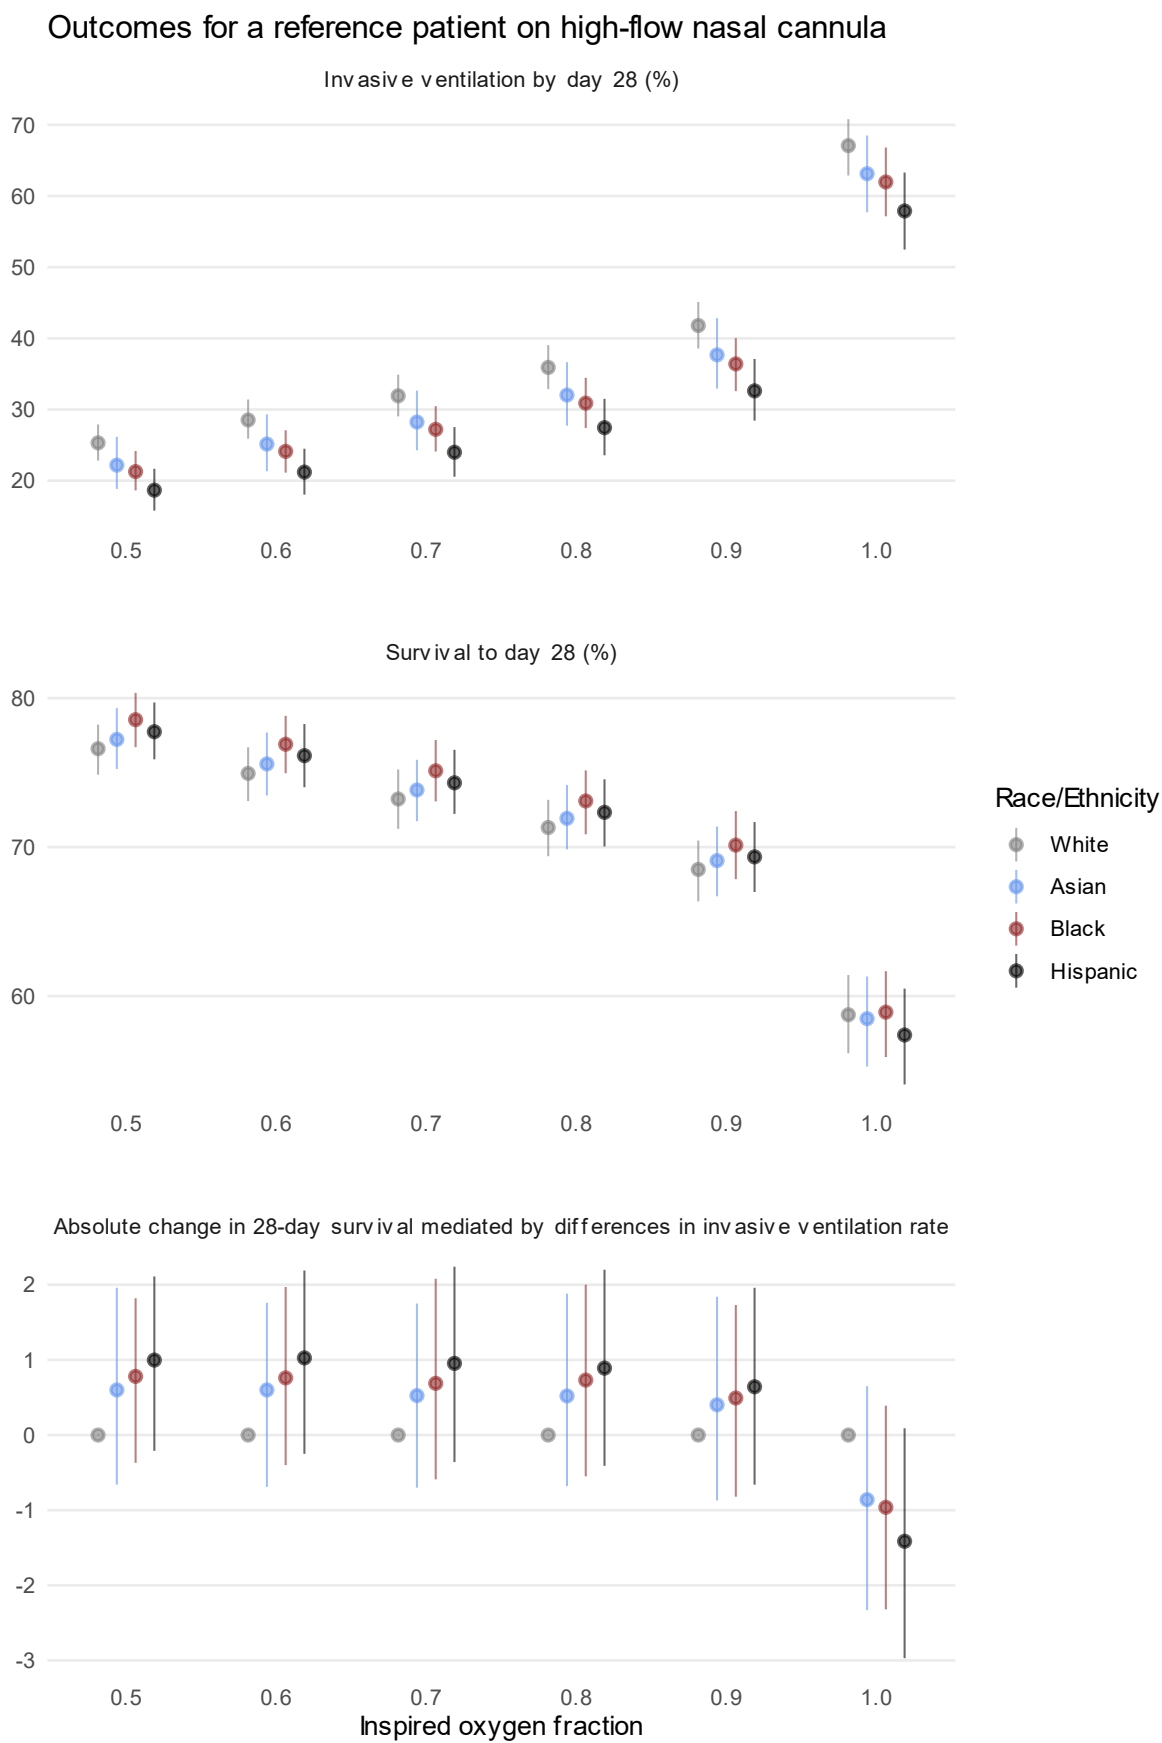

Figure 2 caption: This figure shows the mediation analysis outcomes (y-axis) by patient race/ethnicity (colors) for the reference patient at different inspired oxygen fractions (x-axis) ranging from 0.5 to 1.0. The top panel shows the probability of invasive ventilation by 28 days, the middle panel shows the probability of 28-day survival, and the bottom panel shows the absolute change in 28-day survival mediated by differences in the rate of invasive ventilation. Other than inspired oxygen fraction, the reference patient had covariates set as follows: age = 67, sex = female, no comorbidities, year of ICU admission = 2017-2019, ICU type = medical-surgical, academic teaching hospital = yes, region = Northeast, database = MIMIC-IV, heart rate = 100 beats per minute, respiratory rate = 25 breaths per minute, peripheral oxygen saturation = 94%, GCS = 15, vasopressors = none, oxygen device = high-flow nasal cannula.

## References

1. Parcha V, Kalra R, Bhatt SP, Berra L, Arora G, Arora P. Trends and Geographic Variation in Acute Respiratory Failure and ARDS Mortality in the United States. *Chest*. 2021;159(4):1460-1472. doi:10.1016/j.chest.2020.10.042
2. Bime C, Poongkunran C, Borgstrom M, et al. Racial differences in mortality from severe acute respiratory failure in the United States, 2008-2012. *Annals of the American Thoracic Society*. 2016;13(12):2184-2189. doi:10.1513/AnnalsATS.201605-359OC
3. Erickson SE, Shlipak MG, Martin GS, et al. Racial and ethnic disparities in mortality from acute lung injury. *Crit Care Med*. 2009;37(1):1-6. doi:10.1097/CCM.0b013e31819292ea
4. Erickson SE, Vasilevskis EE, Kuzniewicz MW, et al. The effect of race and ethnicity on outcomes among patients in the intensive care unit: A comprehensive study involving socioeconomic status and resuscitation preferences. *Critical Care Medicine*. 2011;39(3):429-435. doi:10.1097/CCM.0b013e318206b3af
5. Chertoff J. Racial disparities in critical care: experience from the USA. *The Lancet Respiratory Medicine*. 2017;5(2):e11-e12. doi:10.1016/S2213-2600(17)30009-7
6. Gottlieb ER, Ziegler J, Morley K, Rush B, Celi LA. Assessment of Racial and Ethnic Differences in Oxygen Supplementation Among Patients in the Intensive Care Unit. *JAMA Intern Med*. Published online July 11, 2022. doi:10.1001/jamainternmed.2022.2587
7. Sjoding MW, Dickson RP, Iwashyna TJ, Gay SE, Valley TS. Racial Bias in Pulse Oximetry Measurement. *New England Journal of Medicine*. 2020;383(25):2477-2478. doi:10.1056/NEJMc2029240
8. Jubran A, Tobin MJ. Reliability of Pulse Oximetry in Titrating Supplemental Oxygen Therapy in Ventilator-Dependent Patients. *Chest*. 1990;97(6):1420-1425. doi:10.1378/chest.97.6.1420
9. Fawzy A, Wu TD, Wang K, et al. Racial and Ethnic Discrepancy in Pulse Oximetry and Delayed Identification of Treatment Eligibility Among Patients With COVID-19. *JAMA Internal Medicine*. Published online May 31, 2022. doi:10.1001/jamainternmed.2022.1906
10. Perera F, Nadeau K. Climate Change, Fossil-Fuel Pollution, and Children's Health. *New England Journal of Medicine*. 2022;386(24):2303-2314. doi:10.1056/NEJMra2117706



11. Barnato AE, Anthony DL, Skinner J, Gallagher PM, Fisher ES. Racial and Ethnic Differences in Preferences for End-of-Life Treatment. *Journal of General Internal Medicine*. 2009;24(6):695-701. doi:10.1007/s11606-009-0952-6
12. Brown EJ, Polsky D, Barbu CM, Seymour JW, Grande D. Racial Disparities In Geographic Access To Primary Care In Philadelphia. *Health Affairs*. 2016;35(8):1374-1381. doi:10.1377/hlthaff.2015.1612
13. Danziger J, Ángel Armengol de la Hoz M, Li W, et al. Temporal Trends in Critical Care Outcomes in U.S. Minority-Serving Hospitals. *Am J Respir Crit Care Med*. 2020;201(6):681-687. doi:10.1164/rccm.201903-0623OC
14. Fitzgerald C, Hurst S. Implicit bias in healthcare professionals: A systematic review. *BMC Medical Ethics*. 2017;18(1). doi:10.1186/s12910-017-0179-8
15. Hakim R, Watanabe-Tejada L, Sukhal S, Tulaimat A. Acute respiratory failure in randomized trials of noninvasive respiratory support: A systematic review of definitions, patient characteristics, and criteria for intubation. *Journal of Critical Care*. 2020;57:141-147. doi:10.1016/j.jcrc.2020.02.018
16. Bauer PR, Kumbamu A, Wilson ME, et al. Timing of Intubation in Acute Respiratory Failure Associated With Sepsis: A Mixed Methods Study. *Mayo Clinic Proceedings*. 2017;92(10):1502-1510. doi:10.1016/j.mayocp.2017.07.001
17. de Montmollin E, Aboab J, Ferrer R, Azoulay E, Annane D. Criteria for initiation of invasive ventilation in septic shock: An international survey. *Journal of Critical Care*. 2016;31(1):54-57. doi:10.1016/j.jcrc.2015.09.032
18. Cannon KT, Sarrazin MV, Rosenthal GE, Curtis AE, Thomas KW, Kaldjian LC. Use of Mechanical and Noninvasive Ventilation in Black and White Chronic Obstructive Pulmonary Disease Patients within the Veterans Administration Health Care System. *Medical Care*. 2009;47(1):129-133.
19. Sharma RK, Kim H, Gozalo PL, Sullivan DR, Bunker J, Teno JM. The Black and White of Invasive Mechanical Ventilation in Advanced Dementia. *J Am Geriatr Soc*. 2020;68(9):2106-2111. doi:10.1111/jgs.16635
20. Jia Z, Leiter RE, Sanders JJ, et al. Asian American Medicare Beneficiaries Disproportionately Receive Invasive Mechanical Ventilation When Hospitalized at the End-of-Life. *J GEN INTERN MED*. 2022;37(4):737-744. doi:10.1007/s11606-021-06794-6
21. Yarnell CJ, Fu L, Bonares MJ, Nayfeh A, Fowler RA. Association between Chinese or South Asian ethnicity and end-of-life care in Ontario, Canada. *CMAJ*. 2020;192(11):E266-E274. doi:10.1503/cmaj.190655

22. Brown CE, Engelberg RA, Sharma R, et al. Race/Ethnicity, Socioeconomic Status, and Healthcare Intensity at the End of Life. *Journal of Palliative Medicine*. Published online June 2018:jpm.2018.0011. doi:10.1089/jpm.2018.0011
23. Connolly A, Sampson EL, Purandare N. End-of-life care for people with dementia from ethnic minority groups: A systematic review. *Journal of the American Geriatrics Society*. 2012;60(2):351-360. doi:10.1111/j.1532-5415.2011.03754.x
24. Giovanatti A, Elassar H, Karabon P, Wunderlich-Barillas T, Halalau A. Social Determinants of Health Correlating with Mechanical Ventilation of COVID-19 Patients: A Multi-Center Observational Study. *IJGM*. 2021;14:8521-8526. doi:10.2147/IJGM.S334593
25. Qeadan F, VanSant-Webb E, Tingey B, et al. Racial disparities in COVID-19 outcomes exist despite comparable Elixhauser comorbidity indices between Blacks, Hispanics, Native Americans, and Whites. *Sci Rep*. 2021;11(1):8738. doi:10.1038/s41598-021-88308-2
26. Muñoz-Price LS, Nattinger AB, Rivera F, et al. Racial Disparities in Incidence and Outcomes Among Patients With COVID-19. *JAMA Network Open*. 2020;3(9):e2021892. doi:10.1001/jamanetworkopen.2020.21892
27. Quan D, Luna Wong L, Shallal A, et al. Impact of Race and Socioeconomic Status on Outcomes in Patients Hospitalized with COVID-19. *J Gen Intern Med*. 2021;36(5):1302-1309. doi:10.1007/s11606-020-06527-1
28. Pollard TJ, Johnson AEW, Raffa JD, Celi LA, Mark RG, Badawi O. The eICU Collaborative Research Database, a freely available multi-center database for critical care research. *Scientific Data*. 2018;5:180178. doi:10.1038/sdata.2018.178
29. Phillips eICU Research Initiative. *EICU Collaborative Research Database v 2.0 [Database]*. MIT Lab for Computational Physiology; 2017. <https://eicu-crd.mit.edu/about/eicu/>
30. Goldberger AL, Amaral LA, Glass L, et al. PhysioBank, PhysioToolkit, PhysioNet: Components of a new research resource for complex physiologic signals. *Circulation*. 2000;101(23):E215-20.
31. Johnson AEW, Stone DJ, Celi LA, Pollard TJ. The MIMIC Code Repository: Enabling reproducibility in critical care research. *Journal of the American Medical Informatics Association*. 2018;25(1):32-39. doi:10.1093/jamia/ocx084
32. Johnson A, Bulgarelli L, Pollard T, Horng S, Celi LA, Mark R. *MIMIC-IV (Version 0.4)*. PhysioNet; 2020. <https://doi.org/10.13026/a3wn-hq05>
33. Elm E von, Altman DG, Egger M, Pocock SJ, Gøtzsche PC, Vandenbroucke JP. Strengthening the reporting of observational studies in epidemiology (STROBE)

- statement: guidelines for reporting observational studies. *BMJ*. 2007;335(7624):806-808. doi:10.1136/bmj.39335.541782.AD
34. Flanagan A, Frey T, Christiansen SL, Bauchner H. The Reporting of Race and Ethnicity in Medical and Science Journals: Comments Invited. *JAMA*. 2021;325(11):1049-1052. doi:10.1001/jama.2021.2104
  35. Sarkar R, Martin C, Mattie H, Gichoya JW, Stone DJ, Celi LA. Performance of intensive care unit severity scoring systems across different ethnicities in the USA: a retrospective observational study. *Lancet Digit Health*. 2021;3(4):e241-e249. doi:10.1016/S2589-7500(21)00022-4
  36. Gelman A, Carlin JB, Stern HS, Dunson DB, Vehtari A, Rubin DB. *Bayesian Data Analysis, Third Edition*. CRC Press; 2013.
  37. Austin PC, Steyerberg EW, Putter H. Fine-Gray subdistribution hazard models to simultaneously estimate the absolute risk of different event types: Cumulative total failure probability may exceed 1. *Statistics in Medicine*. 2021;40(19):4200-4212. doi:10.1002/sim.9023
  38. Valeri L, Proust-Lima C, Fan W, Chen JT, Jacqmin-Gadda H. A multistate approach for mediation analysis in the presence of semi-competing risks with application in cancer survival disparities. Published online February 25, 2021. doi:10.48550/arXiv.2102.13252
  39. R Core Team. *R: A Language and Environment for Statistical Computing*. R Foundation for Statistical Computing; 2020. <https://www.r-project.org>
  40. Carpenter B, Gelman A, Hoffman MD, et al. Stan: A probabilistic programming language. *Journal of Statistical Software*. 2017;76(1):1-32. doi:10.18637/jss.v076.i01
  41. Ponce M, Van Zon R, Northrup S, et al. Deploying a top-100 supercomputer for large parallel workloads: The Niagara supercomputer. In: *ACM International Conference Proceeding Series*. Association for Computing Machinery; 2019:1-8. doi:10.1145/3332186.3332195
  42. Loken C, Gruner D, Groer L, et al. SciNet: Lessons Learned from Building a Power-efficient Top-20 System and Data Centre. *Journal of Physics: Conference Series*. 2010;256:12026. doi:10.1088/1742-6596/256/1/012026
  43. Barnato AE, Berhane Z, Weissfeld LA, Chang CCH, Linde-Zwirble WT, Angus DC. Racial variation in end-of-life intensive care use: A race or hospital effect? *Health Services Research*. 2006;41(6):2219-2237. doi:10.1111/j.1475-6773.2006.00598.x
  44. Gottlieb ER, Ziegler J, Morley K, Rush B, Celi LA. Assessment of Racial and Ethnic Differences in Oxygen Supplementation Among Patients in the Intensive Care Unit. *JAMA Intern Med*. 2022;182(8):849-858. doi:10.1001/jamainternmed.2022.2587

45. Valbuena VSM, Barbaro RP, Claar D, et al. Racial Bias in Pulse Oximetry Measurement Among Patients About to Undergo Extracorporeal Membrane Oxygenation in 2019-2020: A Retrospective Cohort Study. *Chest*. 2022;161(4):971-978. doi:10.1016/j.chest.2021.09.025
46. Wong AKI, Charpignon M, Kim H, et al. Analysis of Discrepancies Between Pulse Oximetry and Arterial Oxygen Saturation Measurements by Race and Ethnicity and Association With Organ Dysfunction and Mortality. *JAMA Network Open*. 2021;4(11):e2131674. doi:10.1001/jamanetworkopen.2021.31674
47. Bureau UC. Inequalities Persist Despite Decline in Poverty For All Major Race and Hispanic Origin Groups. Census.gov. Accessed September 2, 2022. <https://www.census.gov/library/stories/2020/09/poverty-rates-for-blacks-and-hispanics-reached-historic-lows-in-2019.html>
48. Barnato AE, Chang CCH, Lave JR, Angus DC. The Paradox of End-of-Life Hospital Treatment Intensity among Black Patients: A Retrospective Cohort Study. *Journal of Palliative Medicine*. 2017;21(1):jpm.2016.0557. doi:10.1089/jpm.2016.0557
49. Hall WJ, Chapman MV, Lee KM, et al. Implicit Racial/Ethnic Bias Among Health Care Professionals and Its Influence on Health Care Outcomes: A Systematic Review. *Am J Public Health*. 2015;105(12):e60-e76. doi:10.2105/AJPH.2015.302903
50. Sabin JA. Tackling Implicit Bias in Health Care. *New England Journal of Medicine*. 2022;387(2):105-107. doi:10.1056/NEJMp2201180
51. Gonzalez CM, Lyson ML, Sukhera J. Twelve tips for teaching implicit bias recognition and management. *Medical Teacher*. 2021;43(12):1368-1373. doi:10.1080/0142159X.2021.1879378
52. Greenwald AG, Dasgupta N, Dovidio JF, Kang J, Moss-Racusin CA, Teachman BA. Implicit-Bias Remedies: Treating Discriminatory Bias as a Public-Health Problem. *Psychol Sci Public Interest*. 2022;23(1):7-40. doi:10.1177/15291006211070781
53. Bellani G, Laffey JG, Pham T, et al. Noninvasive Ventilation of Patients with Acute Respiratory Distress Syndrome: Insights from the LUNG SAFE Study. *American Journal of Respiratory and Critical Care Medicine*. 2017;195(1):67-77. doi:10.1164/rccm.201606-1306OC
54. Krishnan JK, Rajan M, Baer BR, et al. Assessing mortality differences across acute respiratory failure management strategies in Covid-19. *Journal of Critical Care*. 2022;70:154045. doi:10.1016/j.jcrc.2022.154045
55. Yarnell CJ, Sklar MC. Noninvasive Respiratory Strategies and Intubation or Mortality Among Patients With Acute Hypoxemic Respiratory Failure Due to COVID-19. *JAMA*. 2022;327(20):2023. doi:10.1001/jama.2022.5276
